# Supplementary material for: RETRACTED: Myricitrin, a Glycosyloxyflavone in Myrica esculenta Bark Ameliorates Diabetic Nephropathy via Improving Glycemic Status, Reducing Oxidative Stress, and Suppressing Inflammation
Source: MDPI journal article supplement (doi:10.3390/molecules26020258), 2021-01-06
Supplement: s1 [file s1]

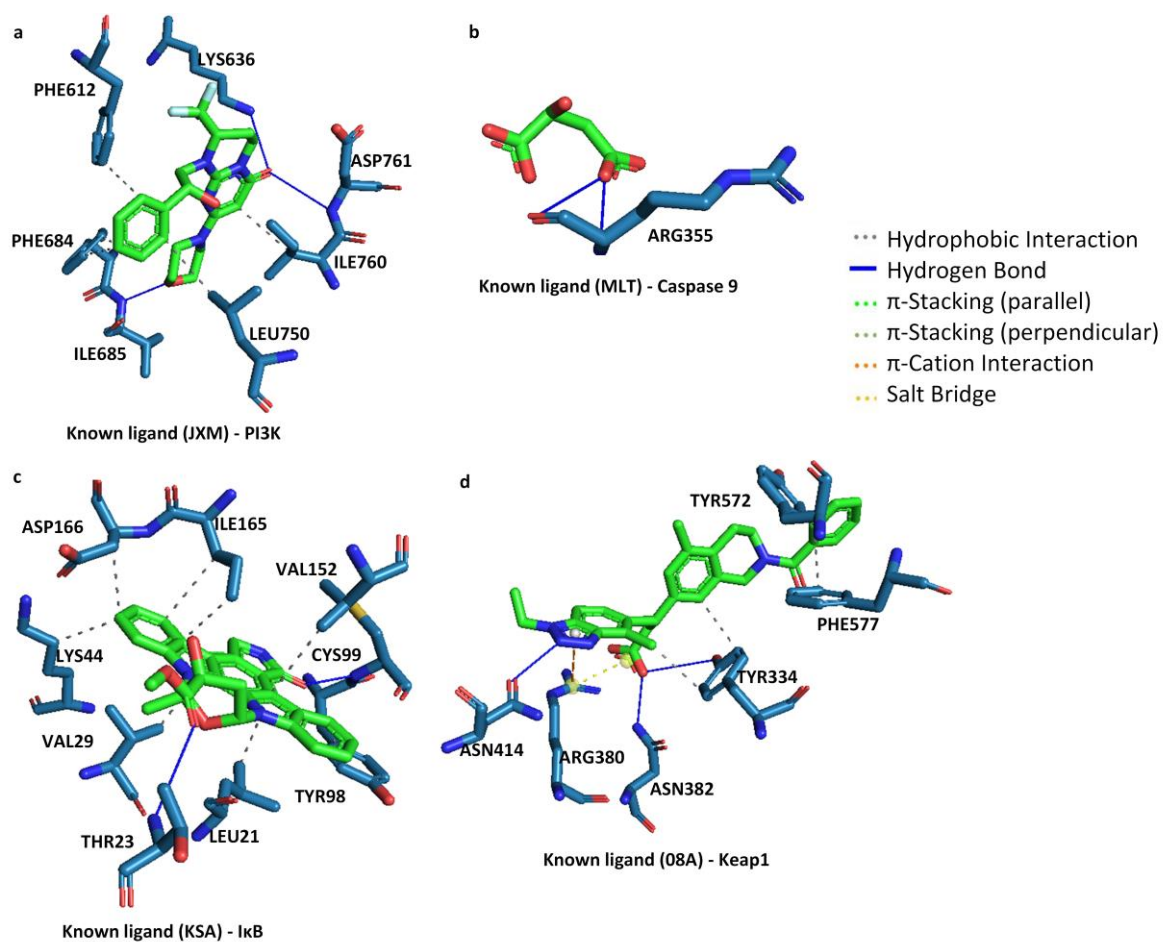

**Figure 1.** Intermolecular interaction analyses of known ligands of four signal proteins: PI3K (a), caspase 9 (b), I $\kappa$ B (c), and Keap1 (d). Predicted molecular docking-based interactions of Myr were compared with these available target proteins of known ligands, which revealed similar types of interacting amino acid residues involved in several intermolecular interactions as obtained for Myr.
